# Supplementary material for: Synthesis of heteroglycoclusters by using orthogonal chemoselective ligations
Source: publisher site journal article supplement (doi:10.3762/bjoc.8.47), 2012-03-20

# Supporting Information

for

## Synthesis of heteroglycoclusters by using orthogonal chemoselective ligations

Baptiste Thomas<sup>1</sup>, Michele Fiore<sup>1</sup>, Isabelle Bossu<sup>1</sup>, Pascal Dumy<sup>1</sup> and Olivier Renaudet<sup>\*1,2</sup>

Address: <sup>1</sup>Département de Chimie Moléculaire, UMR-CNRS 5250 & ICMG FR 2607, Université Joseph Fourier, PB 53, 38041 Grenoble Cedex 9, France and <sup>2</sup>Institut Universitaire de France, 103 boulevard Saint-Michel, 75005 Paris, France.

Email: Olivier Renaudet\* - olivier.renaudet@ujf-grenoble.fr

\*Corresponding author

### Crude RP-HPLC profiles and ESI-MS spectra for the heteroglycoclusters

#### Table of contents:

|    |                                               |       |
|----|-----------------------------------------------|-------|
| 1. | Analytical data for compound <b>5-Man</b>     | S3    |
| 2. | Analytical data for compound <b>5-Fuc</b>     | S4    |
| 3. | Analytical data for compound <b>5-Lac</b>     | S5    |
| 4. | Analytical data for compound <b>6-Man/Fuc</b> | S6    |
| 5. | Analytical data for compound <b>6-Man/Lac</b> | S7    |
| 6. | Analytical data for compound <b>6-Fuc/Man</b> | S8–S9 |
| 7. | Analytical data for compound <b>6-Fuc/Lac</b> | S10   |
| 8. | Analytical data for compound <b>6-Lac/Man</b> | S11   |

|     |                                               |         |
|-----|-----------------------------------------------|---------|
| 9.  | Analytical data for compound <b>6-Lac/Fuc</b> | S12     |
| 10. | Analytical data for compound <b>7-Man</b>     | S13     |
| 11. | Analytical data for compound <b>7-Fuc</b>     | S14     |
| 12. | Analytical data for compound <b>7-Lac</b>     | S15     |
| 13. | Analytical data for compound <b>8-Man/Fuc</b> | S16     |
| 14. | Analytical data for compound <b>8-Man/Lac</b> | S17     |
| 15. | Analytical data for compound <b>8-Fuc/Man</b> | S18–S19 |
| 16. | Analytical data for compound <b>8-Fuc/Lac</b> | S20     |
| 17. | Analytical data for compound <b>8-Lac/Man</b> | S21     |
| 18. | Analytical data for compound <b>8-Lac/Fuc</b> | S22     |

## General details

All chemical reagents were purchased from Aldrich (Saint Quentin Fallavier, France) or Acros (Noisy-Le-Grand, France) and were used without further purification. Protected amino acids and Fmoc-Gly-Sasrin resin were obtained from Advanced ChemTech Europe (Brussels, Belgium), Bachem Biochimie SARL (Voisins-Les-Bretonneux, France) and France Biochem S.A. (Meudon, France). PyBOP was purchased from France Biochem. Reaction progress was monitored by reverse-phase HPLC on Waters equipment by using C<sub>18</sub> columns. Analytical and preparative separation was carried out at 1.0 mL/min (EC 125/3 nucleosil 300-5 C<sub>18</sub>) and at 22 mL/min (VP 250/21 nucleosil 300-7 C<sub>18</sub>) with UV monitoring at 214 nm and 250 nm by using a linear A–B gradient (buffer A: 0.09% CF<sub>3</sub>CO<sub>2</sub>H in water; buffer B: 0.09% CF<sub>3</sub>CO<sub>2</sub>H in 90% acetonitrile). Each glycopeptide was analyzed by mass spectrometry by using electrospray ionization on an Esquire 3000+ Bruker Daltonics in positive mode. <sup>1</sup>H NMR and G-COSY were recorded in D<sub>2</sub>O at 400 MHz with a Bruker Avance 400 spectrometer.

1. Analytical data for compound **5-Man**

Crude RP-HPLC profile (5 to 100% B in 20 min,  $\lambda = 250$  nm)

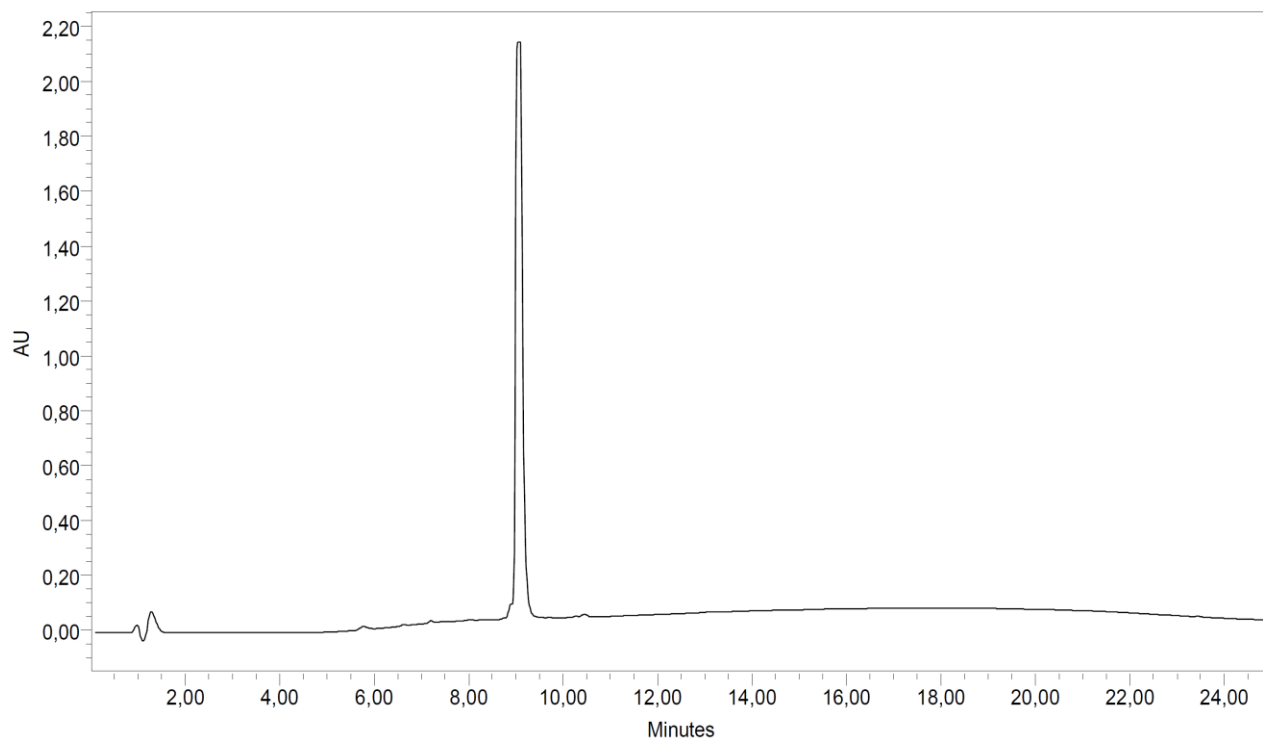

ESI-MS (positive mode): calcd for  $C_{60}H_{97}N_{20}O_{24}$  1481.7, found:  $m/z$  1481.9  $[M + H]^+$

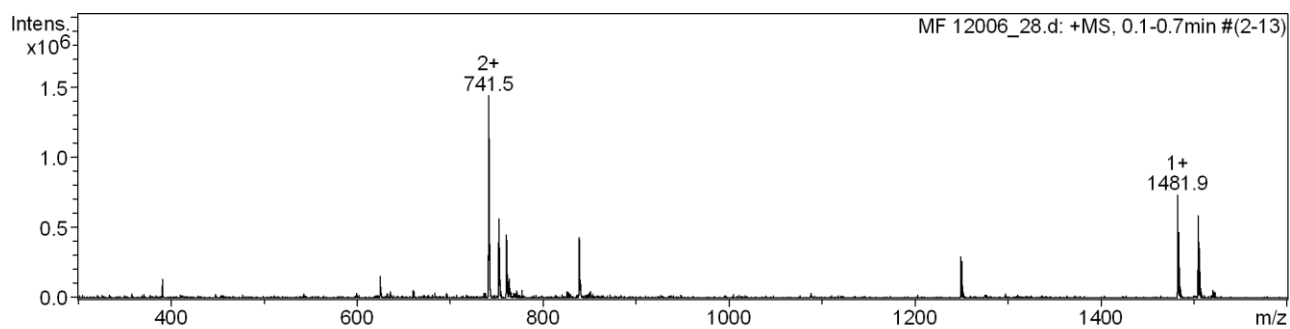

2. *Analytical data for compound 5-Fuc*

Crude RP-HPLC profile (5 to 100% B in 20 min,  $\lambda = 250$  nm)

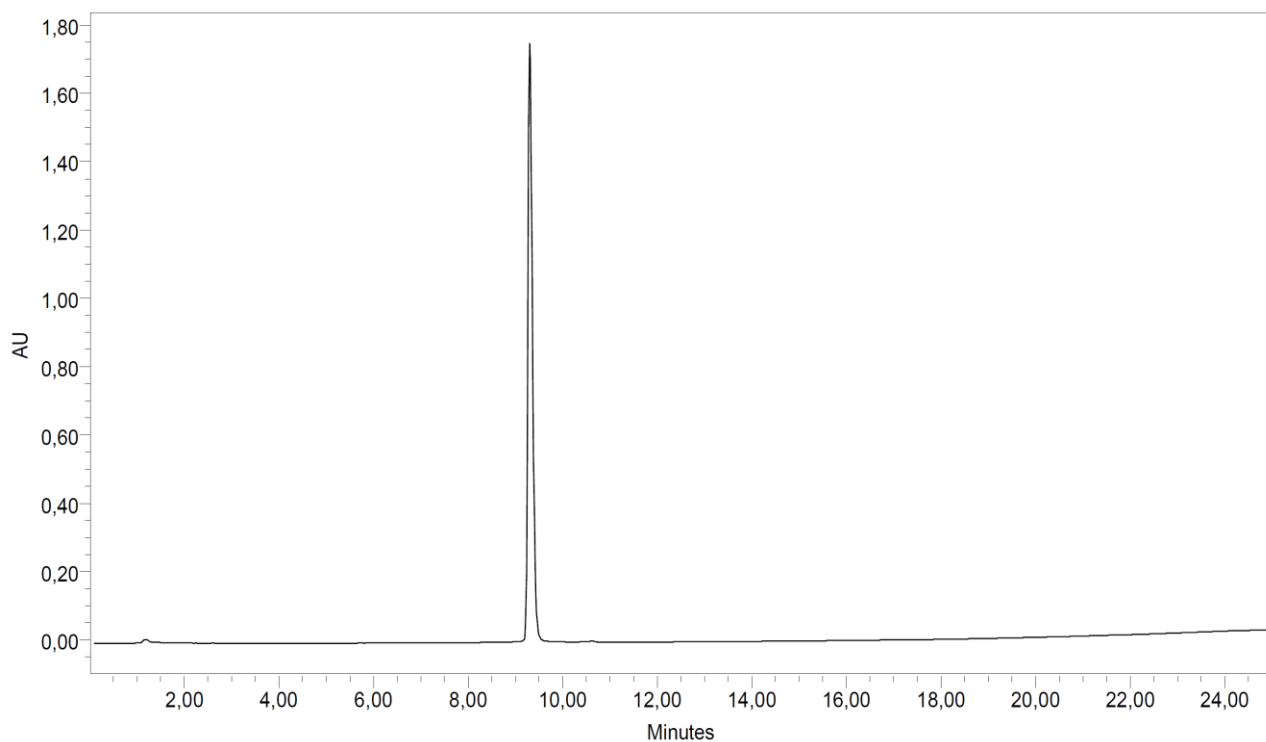

ESI-MS (positive mode): calcd for  $C_{60}H_{96}N_{20}O_{22}Na$  1471.7, found:  $m/z$  1471.8  $[M + Na]^+$

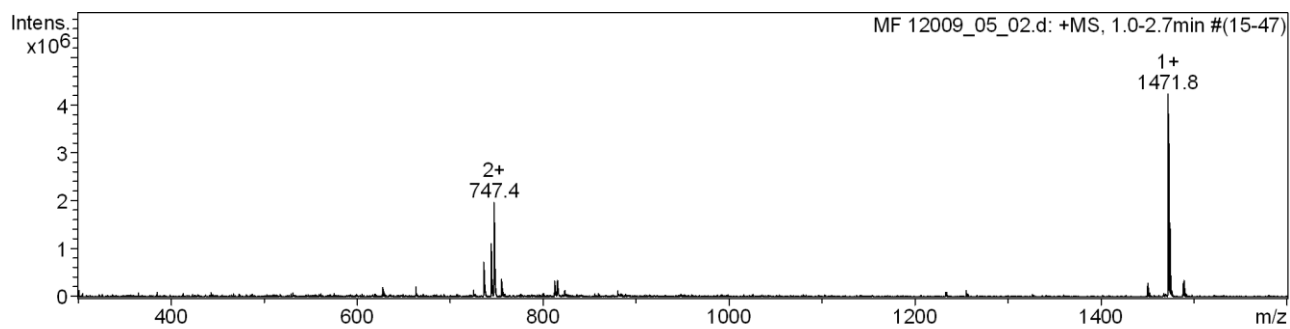

### 3. Analytical data for compound **5-Lac**

Crude RP-HPLC profile (5 to 100% B in 20 min,  $\lambda = 250$  nm)

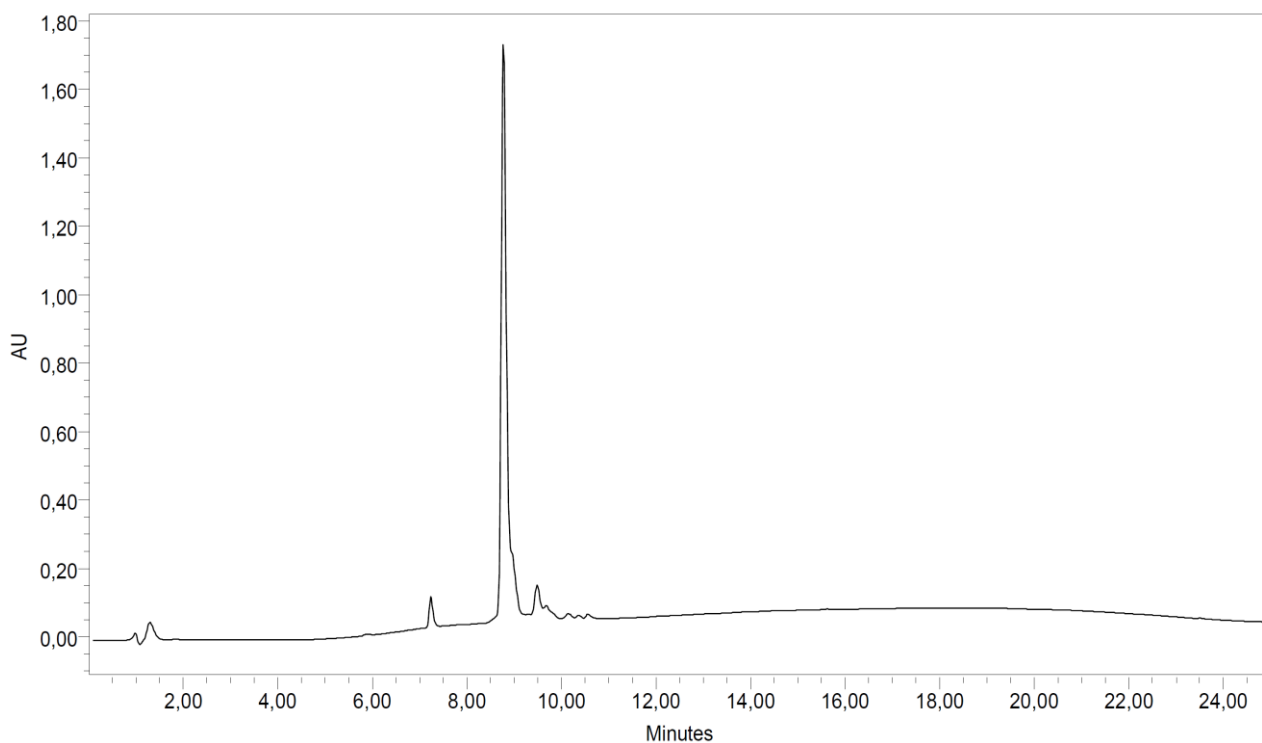

ESI-MS (positive mode): calcd for  $C_{72}H_{117}N_{20}O_{34}$  1805.8, found:  $m/z$  1806.0  $[M + H]^+$

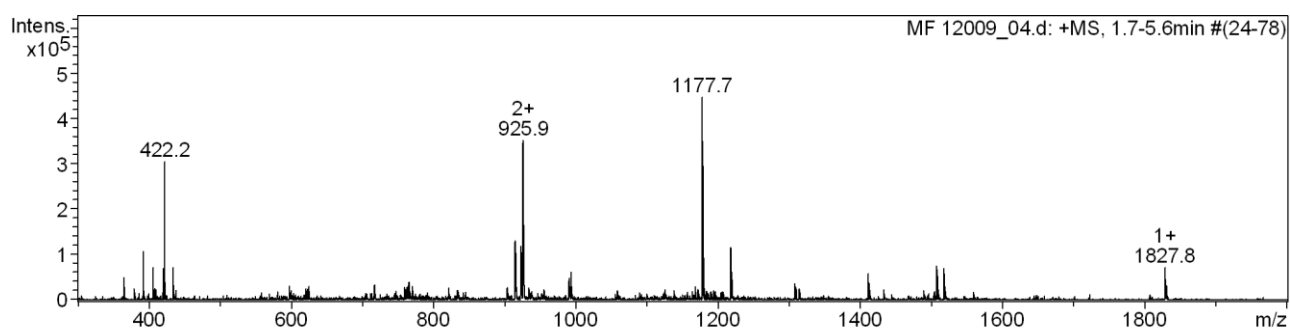

4. Analytical data for compound **6-Man/Fuc**

Crude RP-HPLC profile (5 to 100% B in 20 min,  $\lambda = 250$  nm)

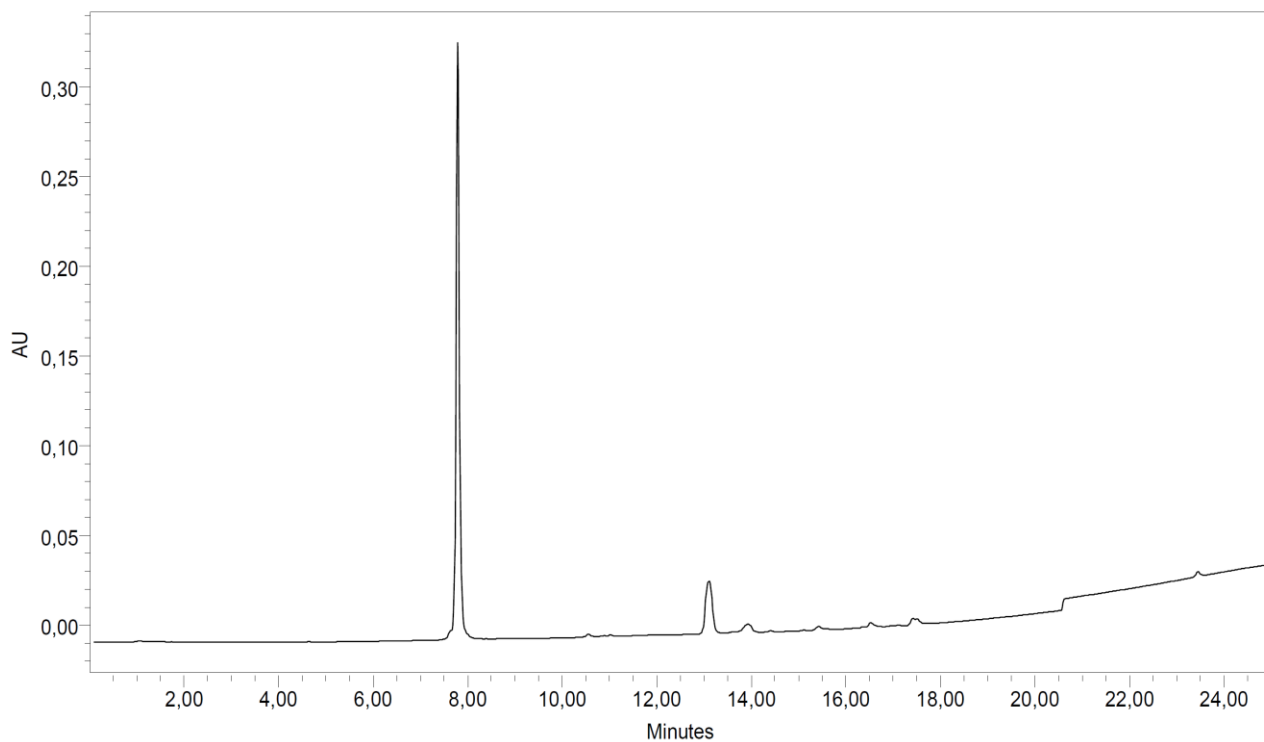

ESI-MS (positive mode): calcd for  $C_{78}H_{124}N_{20}O_{34}$  1885.9, found:  $m/z$  1886.0 $[M + H]^+$

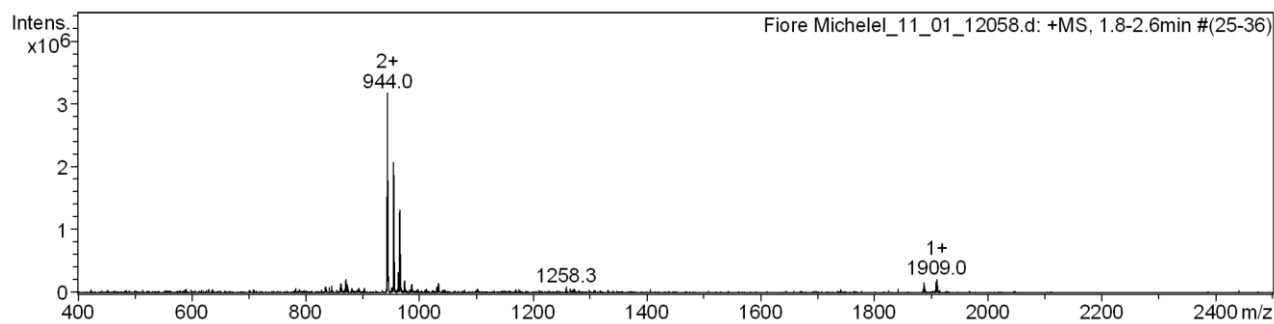

5. Analytical data for compound **6-Man/Lac**

Crude RP-HPLC profile (5 to 100% B in 20 min,  $\lambda = 250$  nm)

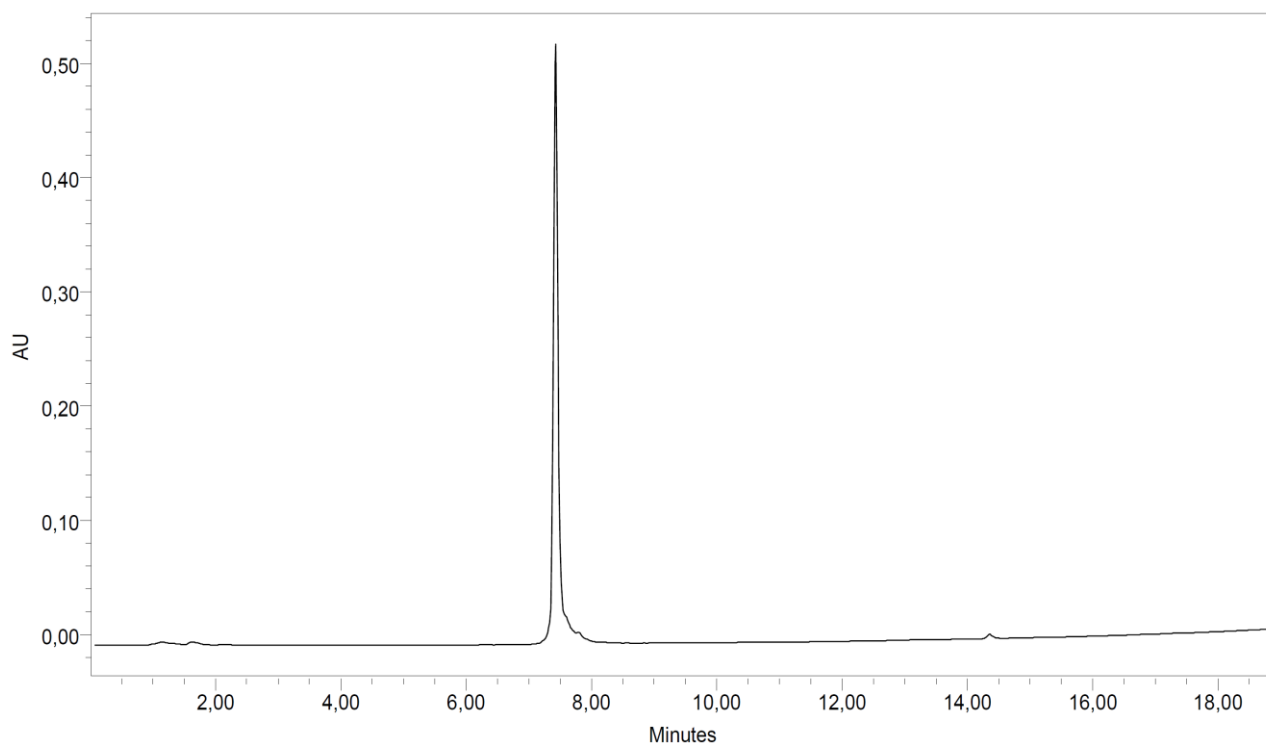

ESI-MS (positive mode): calcd for  $C_{90}H_{144}N_{20}O_{46}$  2242.9, found:  $m/z$  2242.3  $[M + H]^+$

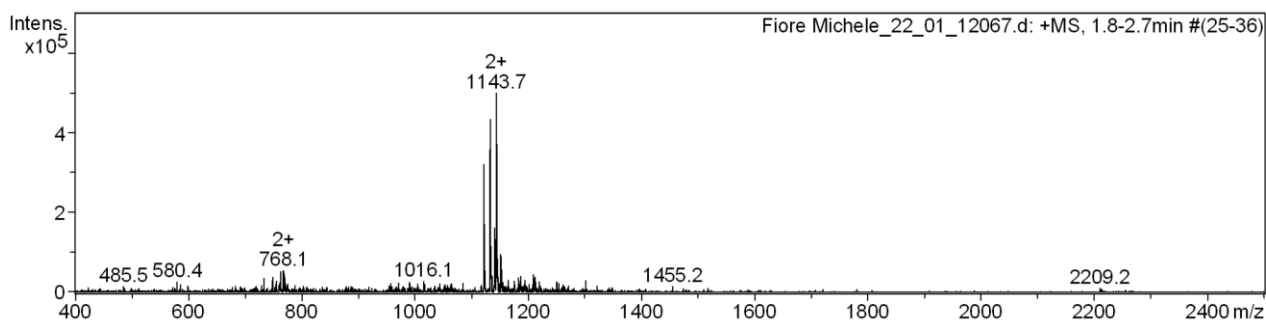

6. Analytical data for compound **6-Fuc/Man**

Crude RP-HPLC profile (5 to 100% B in 20 min,  $\lambda = 250$  nm)

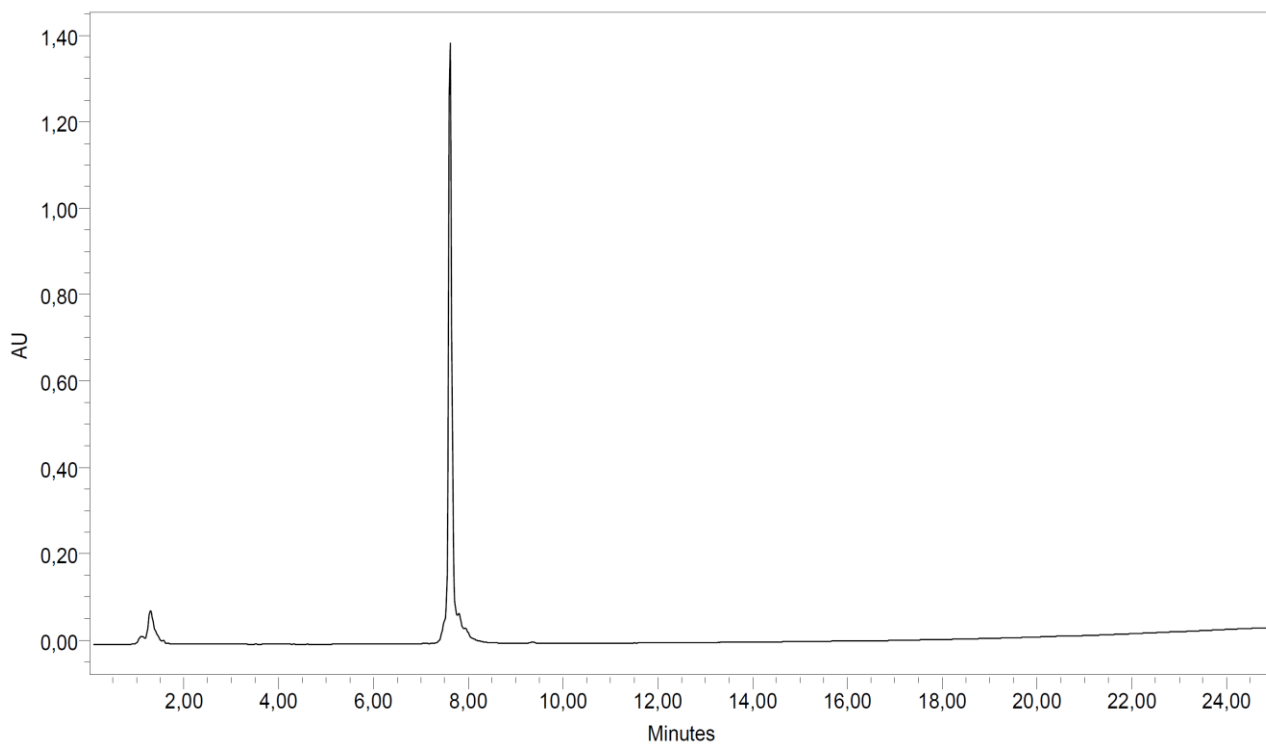

ESI-MS (positive mode): calcd for  $C_{78}H_{124}N_{20}O_{34}$  1885.9, found:  $m/z$  1886.0  $[M + H]^+$

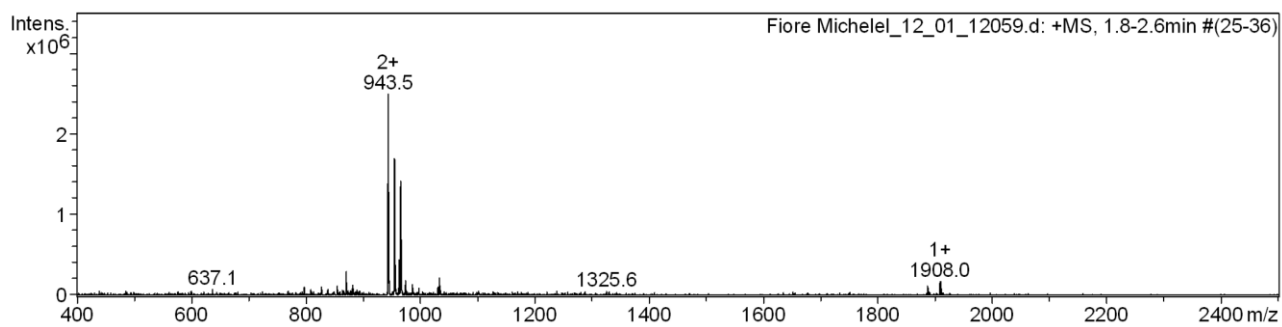



$^1\text{H}$  NMR ( $\text{D}_2\text{O}$ , 400 MHz)

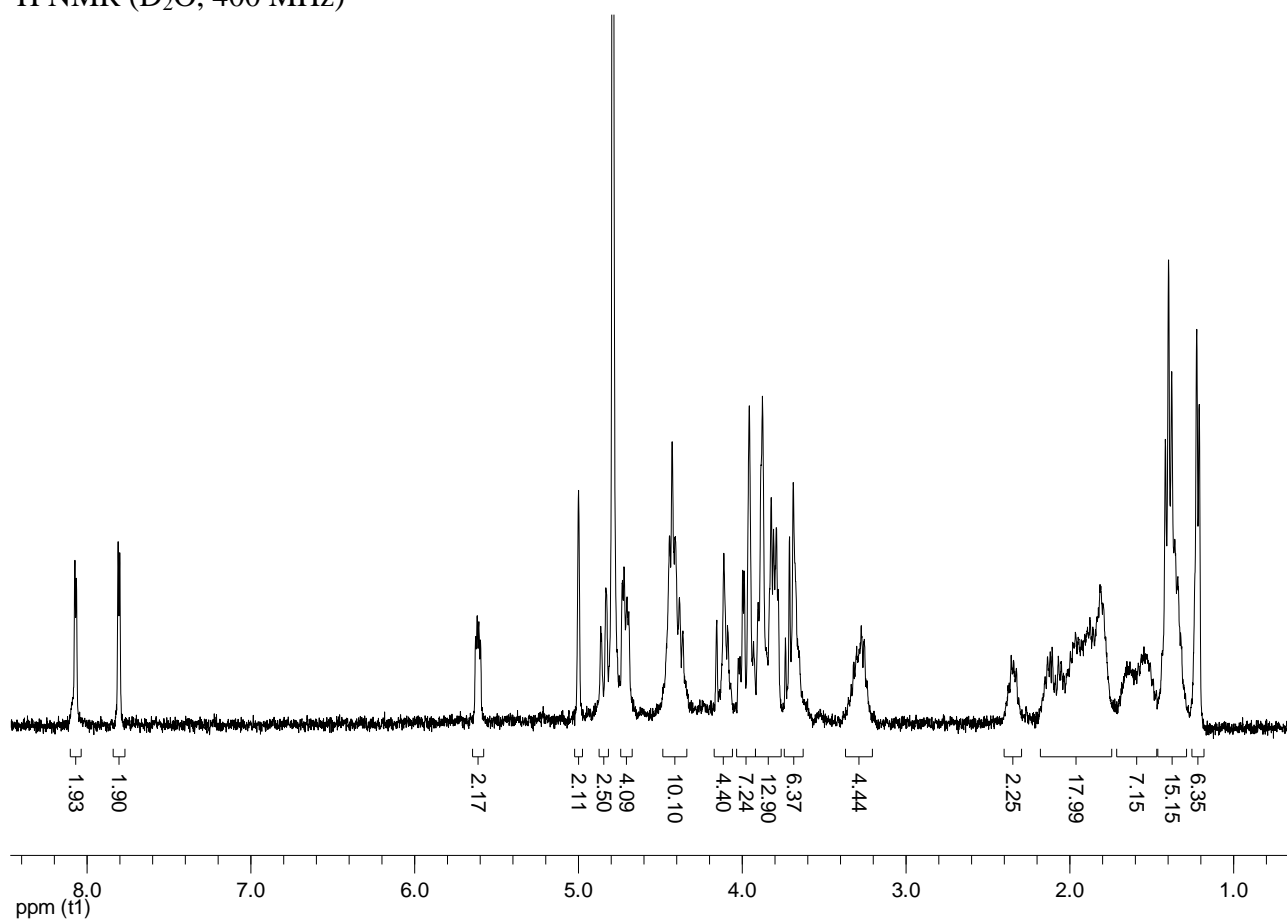

G-COSY ( $\text{D}_2\text{O}$ , 400 MHz)

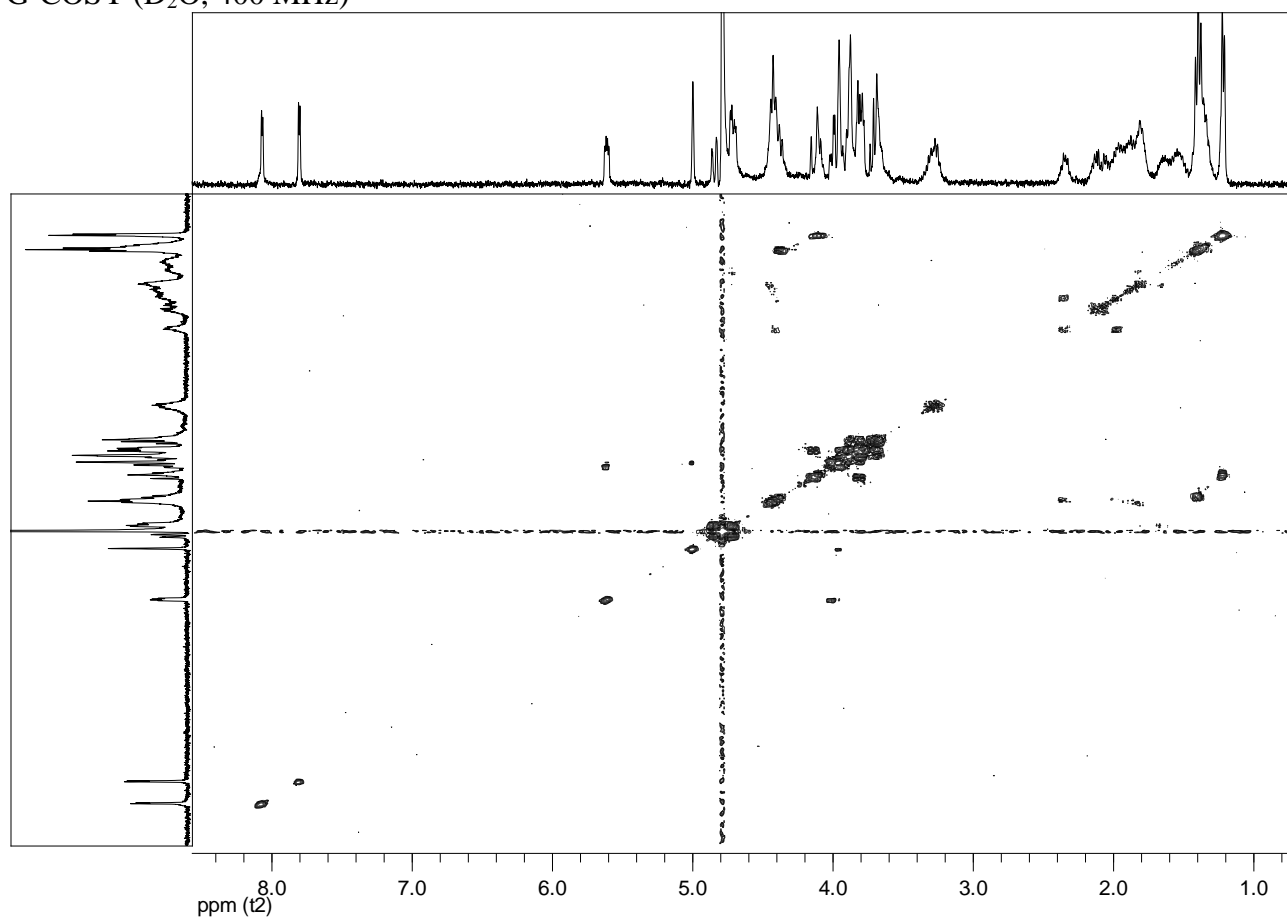

7. Analytical data for compound **6-Fuc/Lac**

Crude RP-HPLC profile (5 to 100% B in 20 min,  $\lambda = 250$  nm)

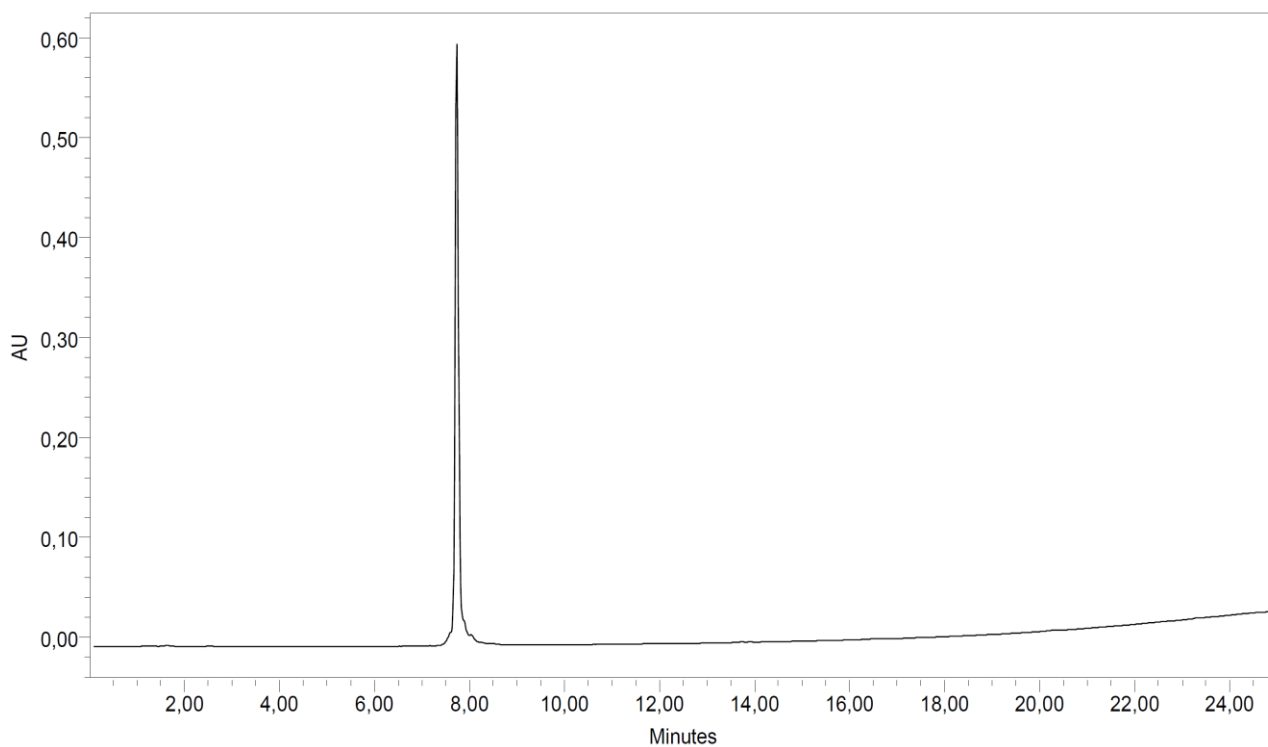

ESI-MS (positive mode): calcd for  $C_{90}H_{144}N_{20}O_{44}$  2210.0, found:  $m/z$  2210.3  $[M + H]^+$

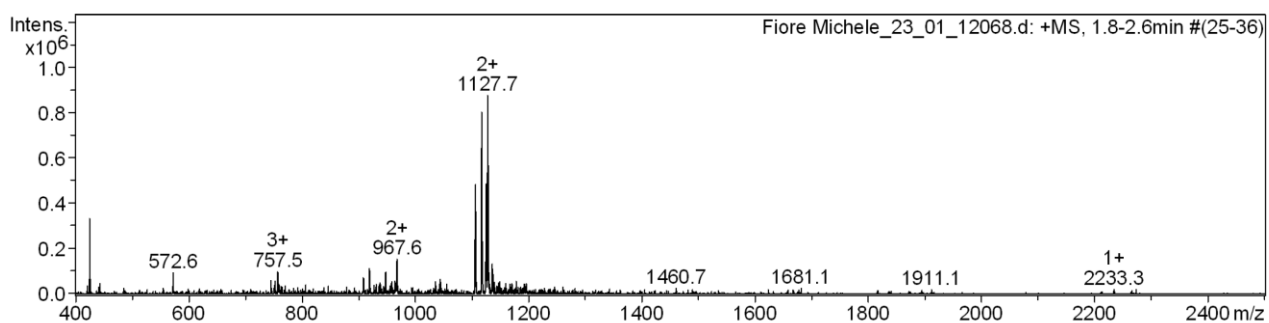

8. *Analytical data for compound 6-Lac/Man*

Crude RP-HPLC profile (5 to 100% B in 20 min,  $\lambda = 250$  nm)

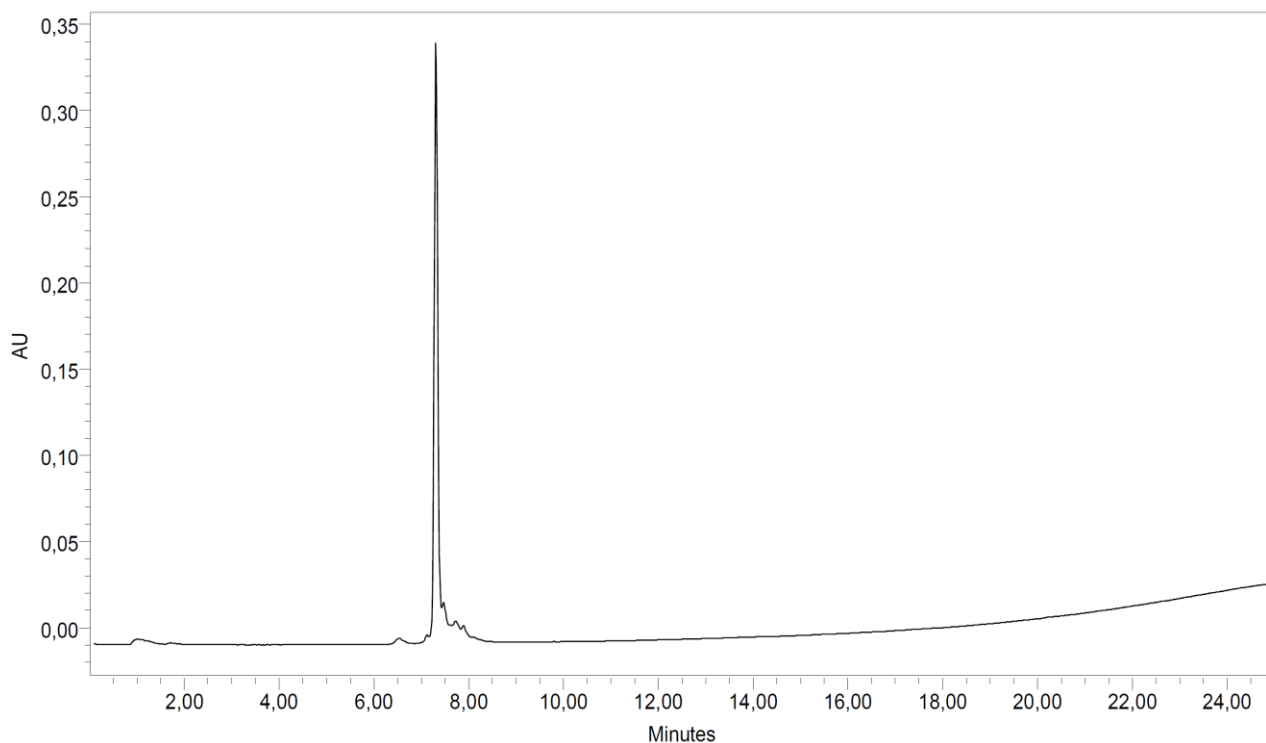

ESI-MS (positive mode): calcd for  $C_{90}H_{145}N_{20}O_{46}$  2242.9, found:  $m/z$  2242.2  $[M + H]^+$

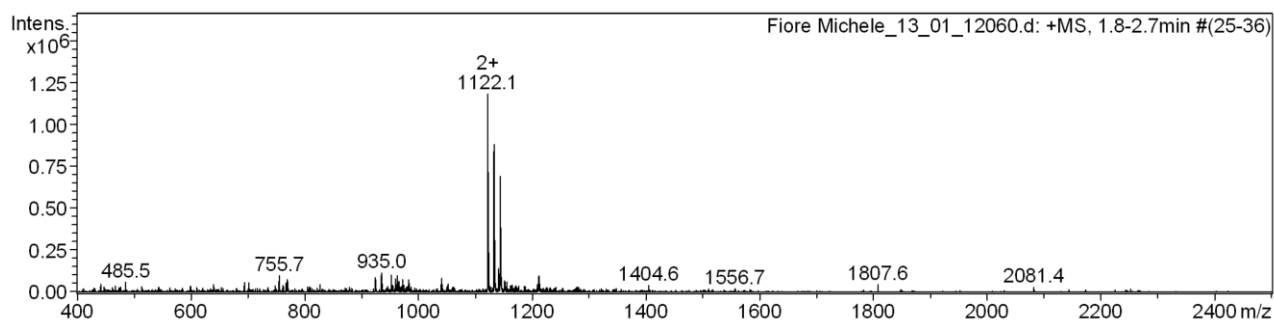

9. Analytical data for compound **6-Lac/Fuc**

Crude RP-HPLC profile (5 to 100% B in 20 min,  $\lambda = 250$  nm)

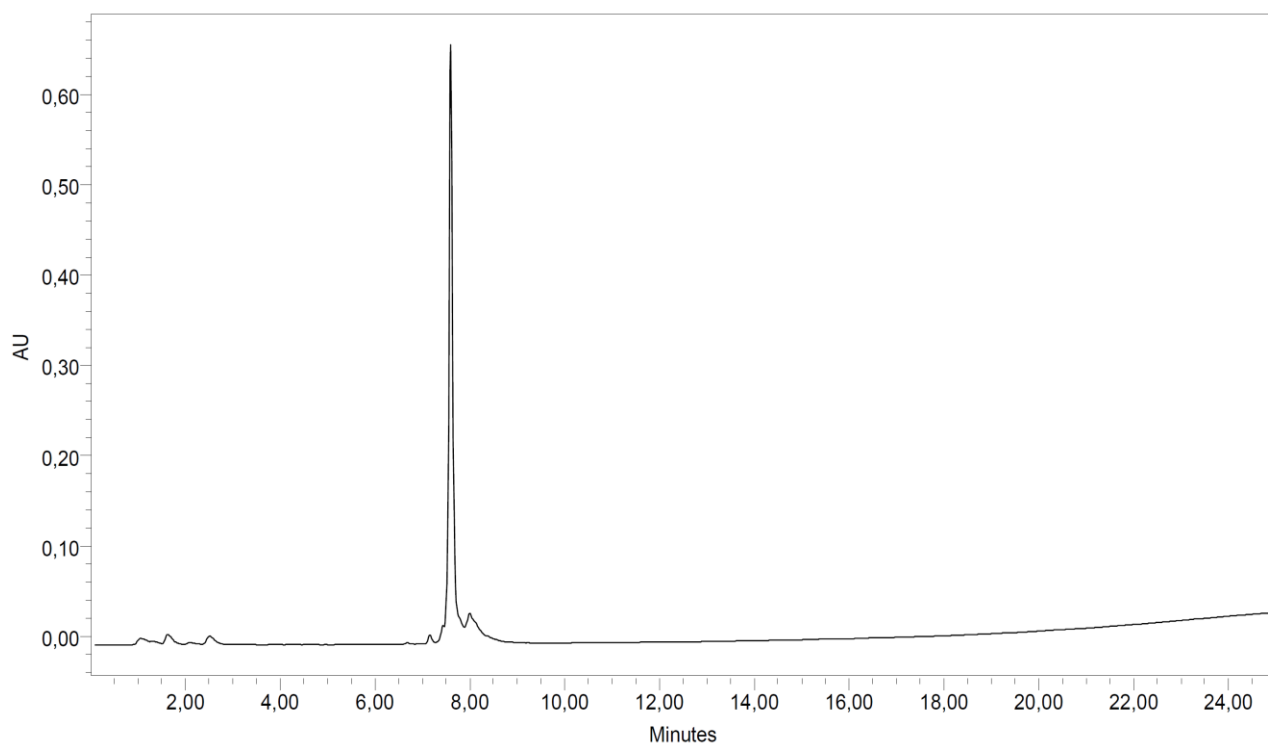

ESI-MS (positive mode): calcd for  $C_{90}H_{145}N_{20}O_{44}$  2210.0, found:  $m/z$  2210.3  $[M + H]^+$

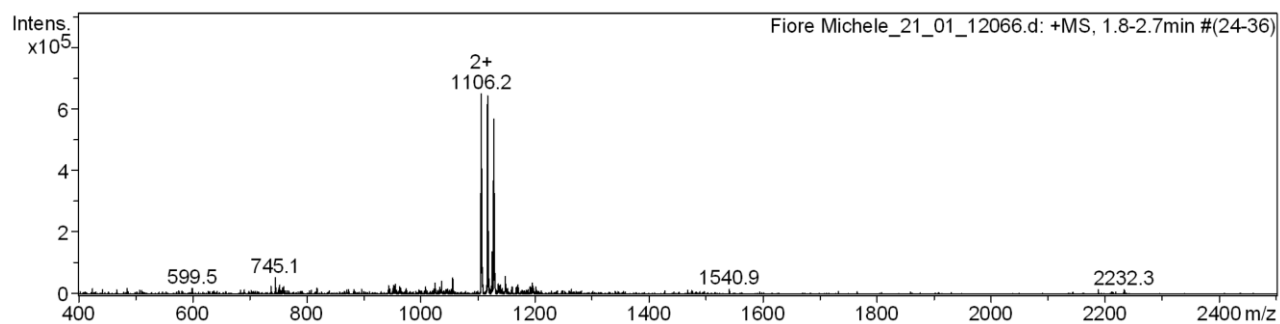

10. Analytical data for compound **7-Man**

Crude RP-HPLC profile (5 to 100% B in 20 min,  $\lambda = 250$  nm)

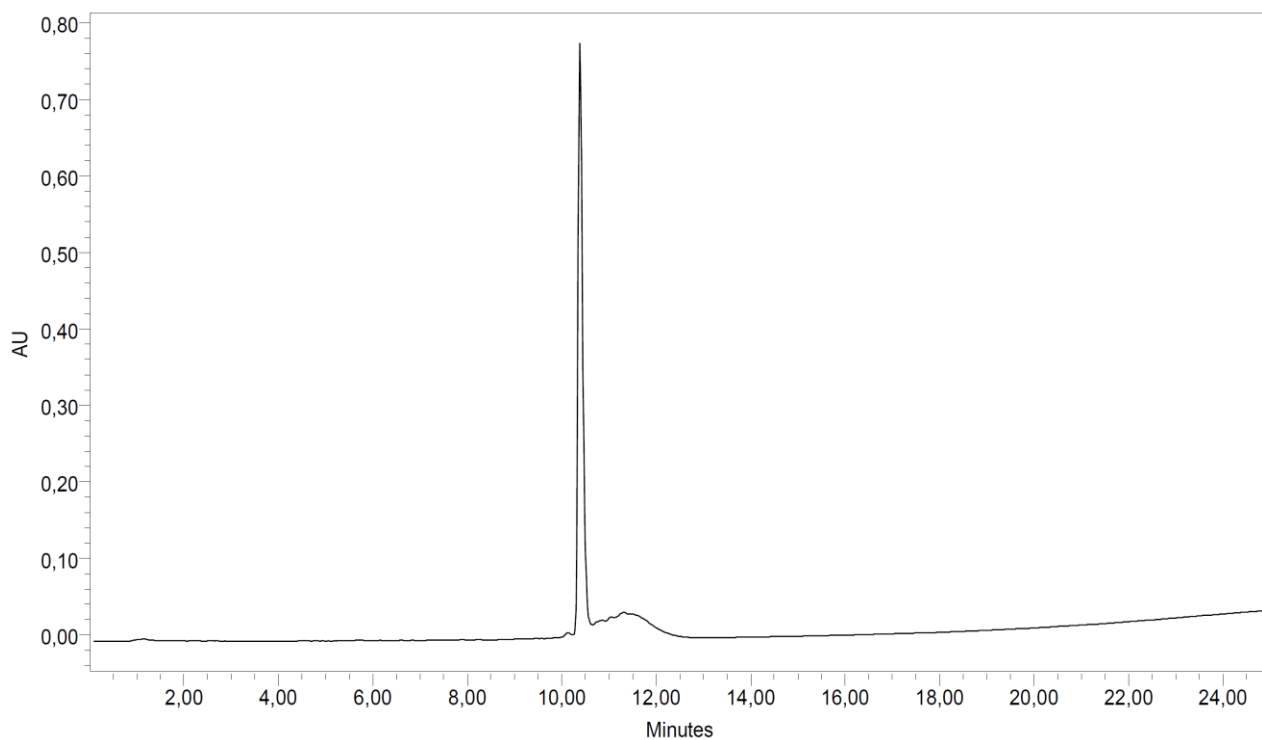

ESI-MS (positive mode): calcd for  $C_{52}H_{84}N_{21}O_{16}$  1258.6, found:  $m/z$  1258.8  $[M + H]^+$

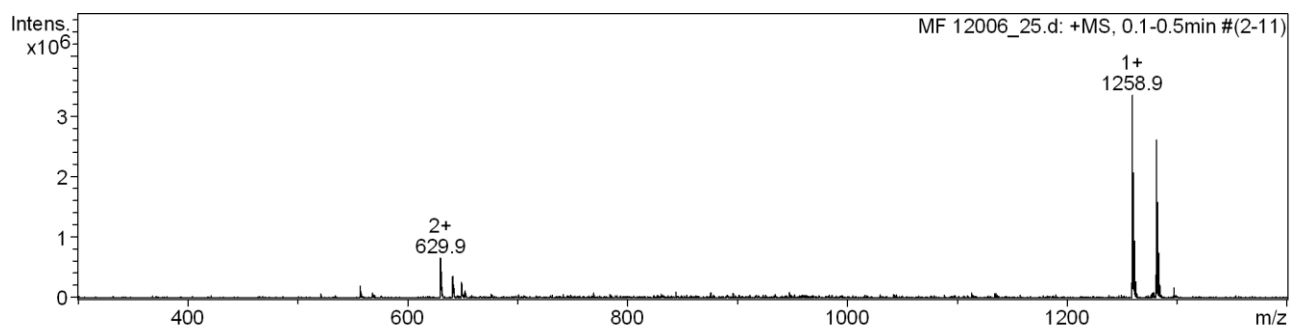

11. Analytical data for compound **7-Fuc**

Crude RP-HPLC profile (5 to 100% B in 20 min,  $\lambda = 250$  nm)

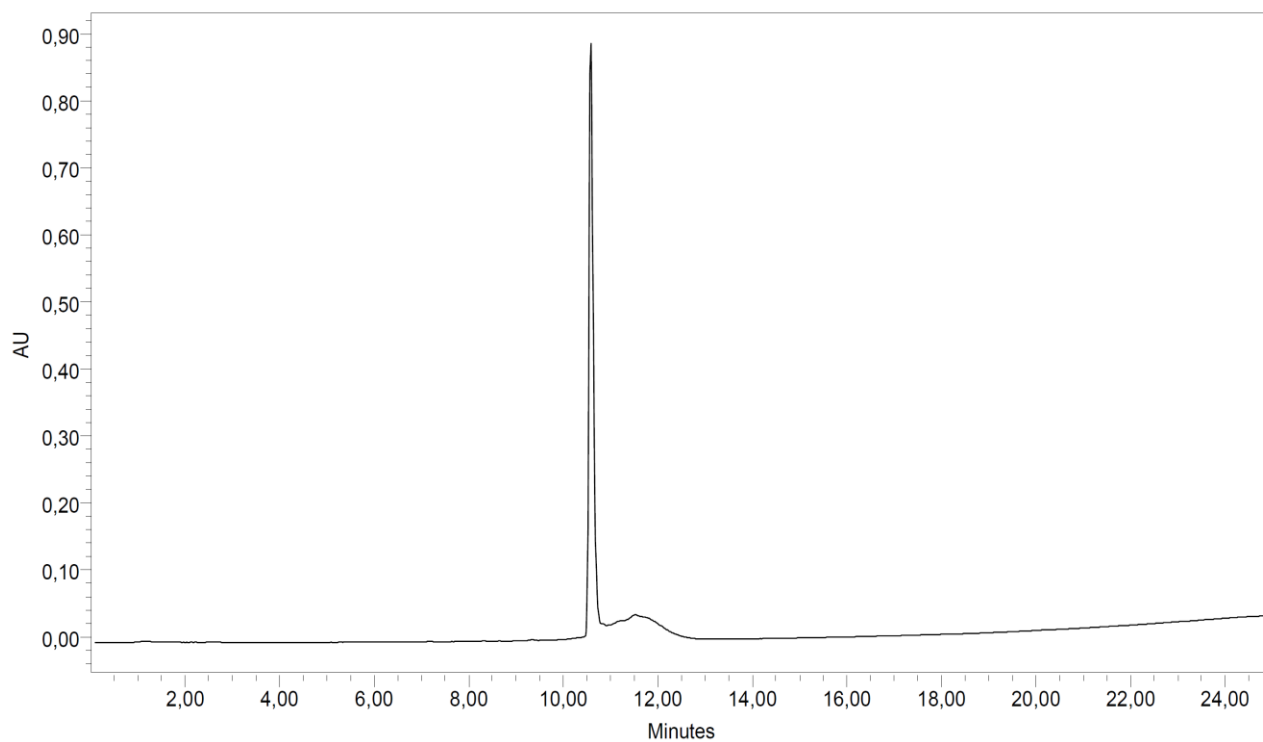

ESI-MS (positive mode): calcd for  $C_{52}H_{84}N_{21}O_{17}$  1274.6, found:  $m/z$  1274.8  $[M + H]^+$

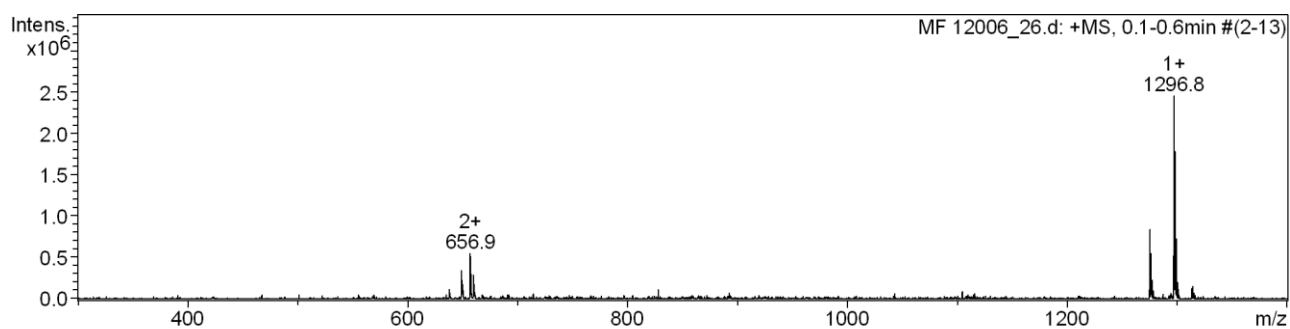

12. Analytical data for compound **7-Lac**

Crude RP-HPLC profile (5 to 100% B in 20 min,  $\lambda = 250$  nm)

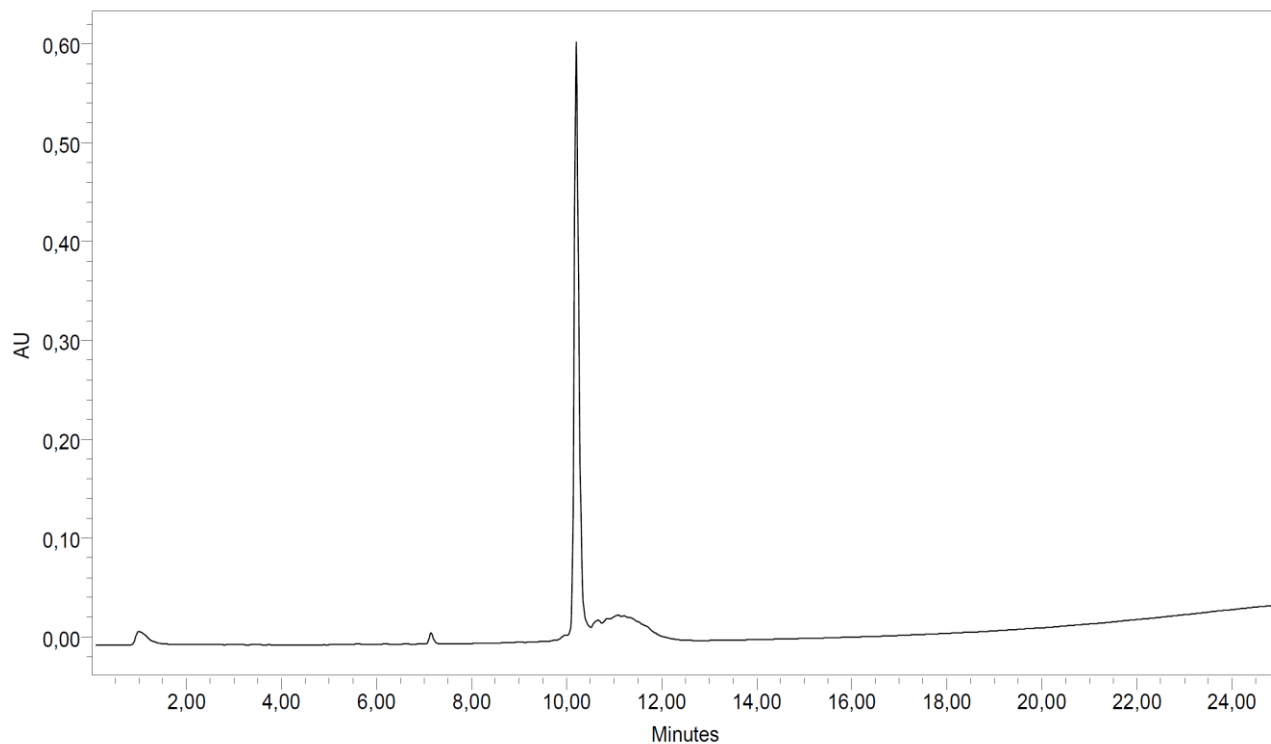

ESI-MS (positive mode): calcd for  $C_{58}H_{94}N_{21}O_{22}$  1436.7, found:  $m/z$  1436.9  $[M + H]^+$

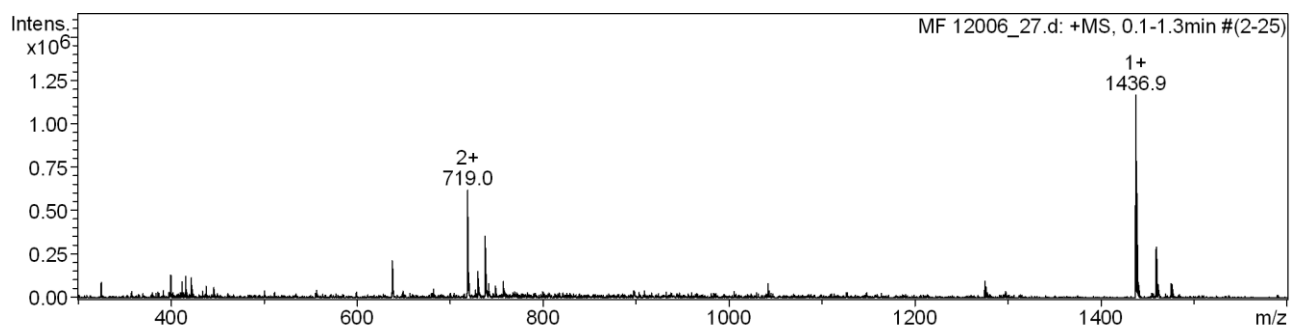

13. Analytical data for compound **8-Man/Fuc**

Crude RP-HPLC profile (5 to 100% B in 20 min,  $\lambda = 250$  nm)

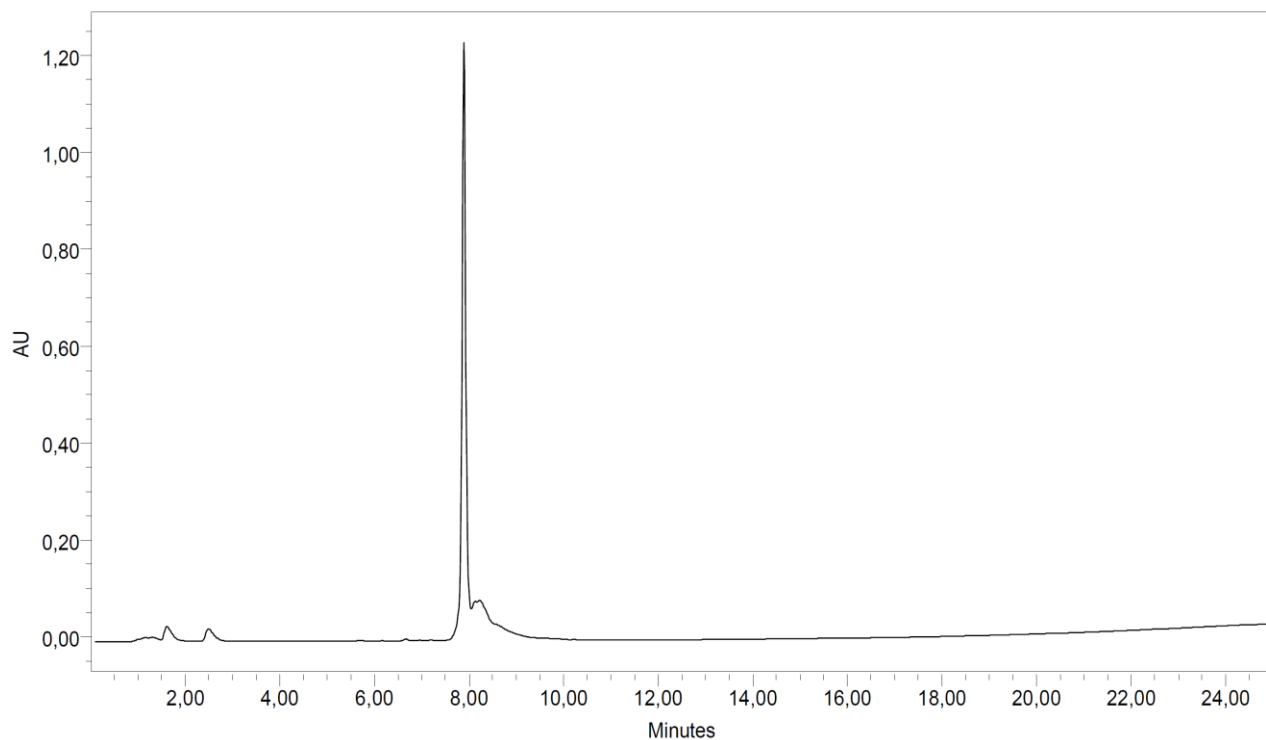

ESI-MS (positive mode): calcd for  $C_{79}H_{126}N_{21}O_{32}$  1880.9, found:  $m/z$  1881.1  $[M + H]^+$

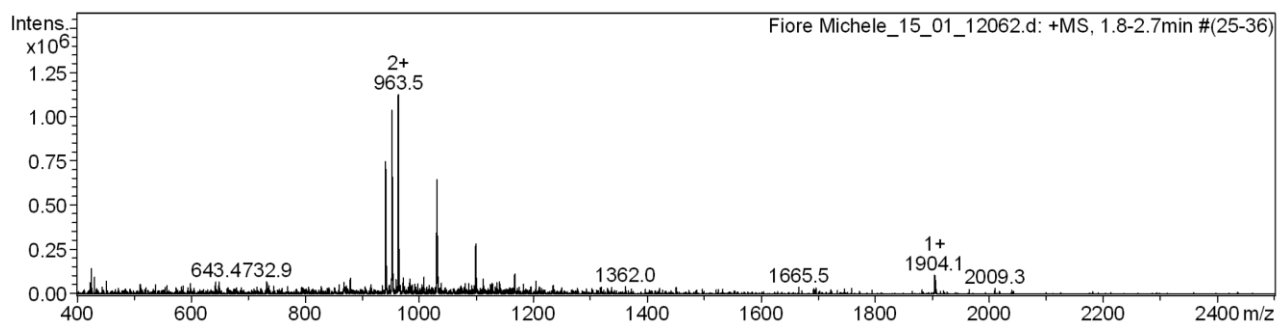



14. Analytical data for compound **8-Man/Lac**

Crude RP-HPLC profile (5 to 100% B in 20 min,  $\lambda = 250$  nm)

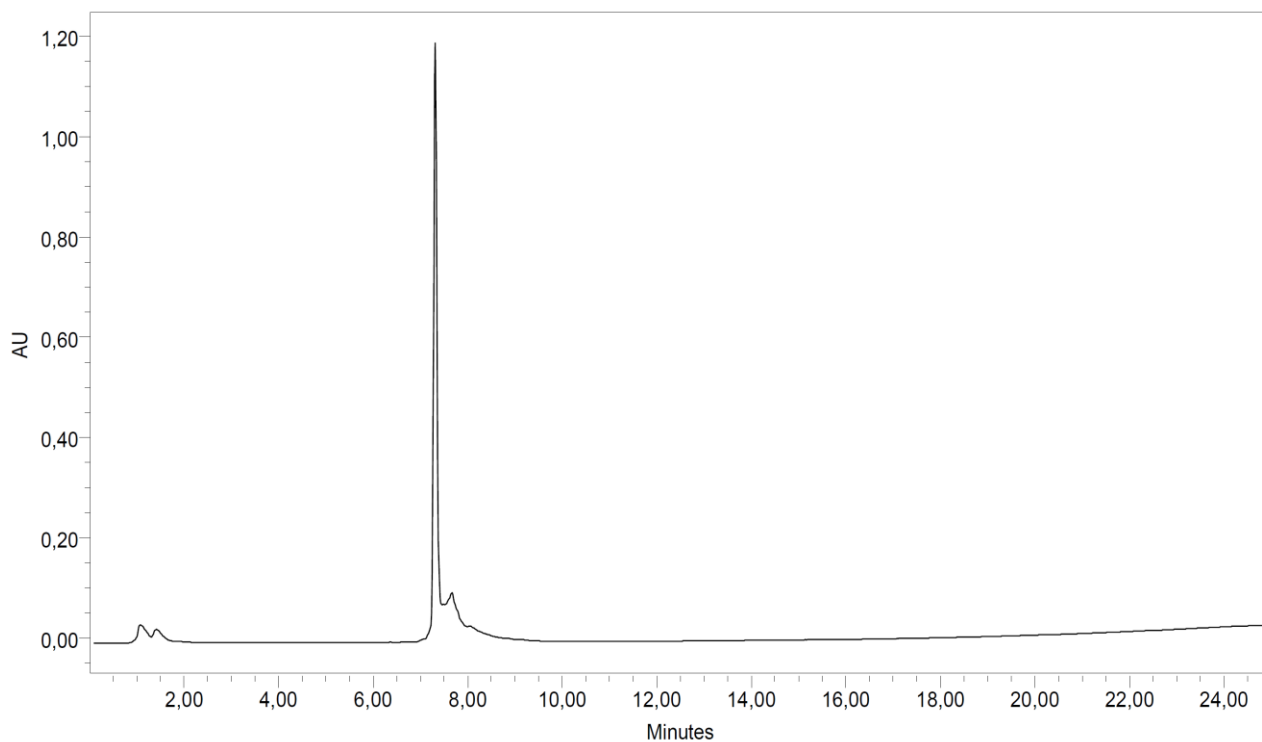

ESI-MS (positive mode): calcd for  $C_{97}H_{156}N_{21}O_{50}$  2415.0, found:  $m/z$  2415.4  $[M + H]^+$

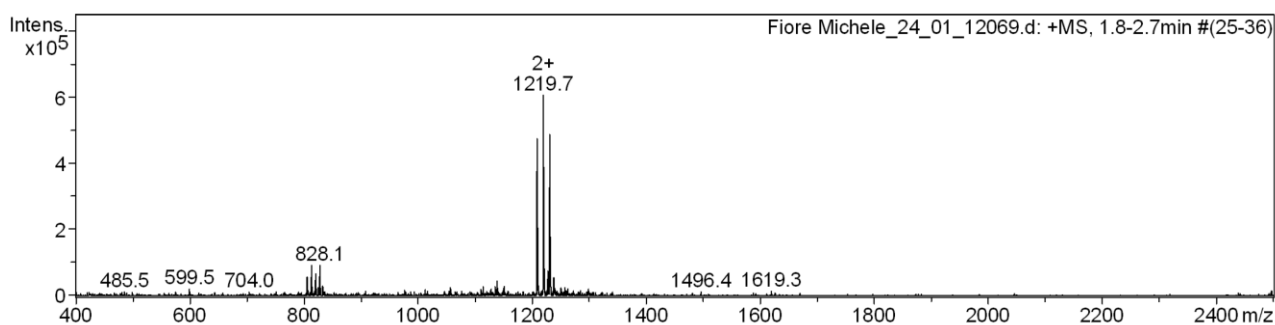

15. Analytical data for compound **8-Fuc/Man**

Crude RP-HPLC profile (5 to 100% B in 20 min,  $\lambda = 250$  nm)

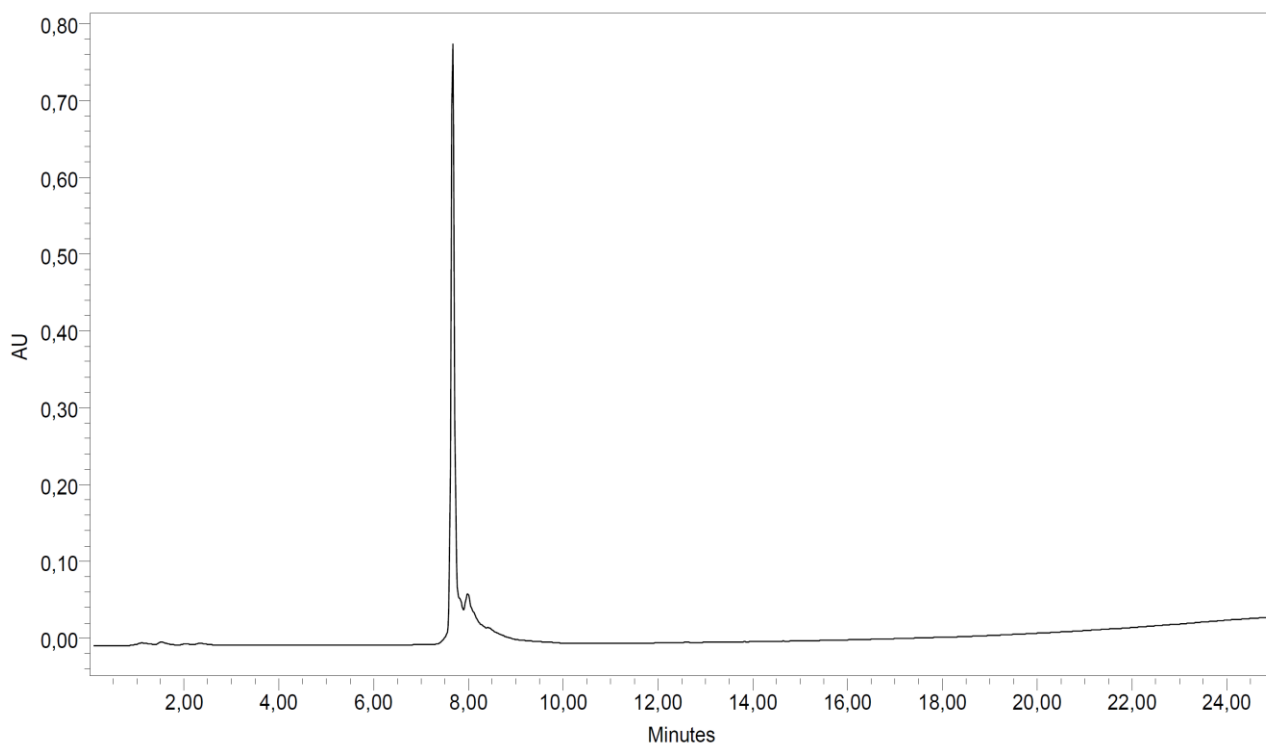

ESI-MS (positive mode): calcd for  $C_{79}H_{126}N_{21}O_{34}$  1912.9, found:  $m/z$  1913.2  $[M + H]^+$

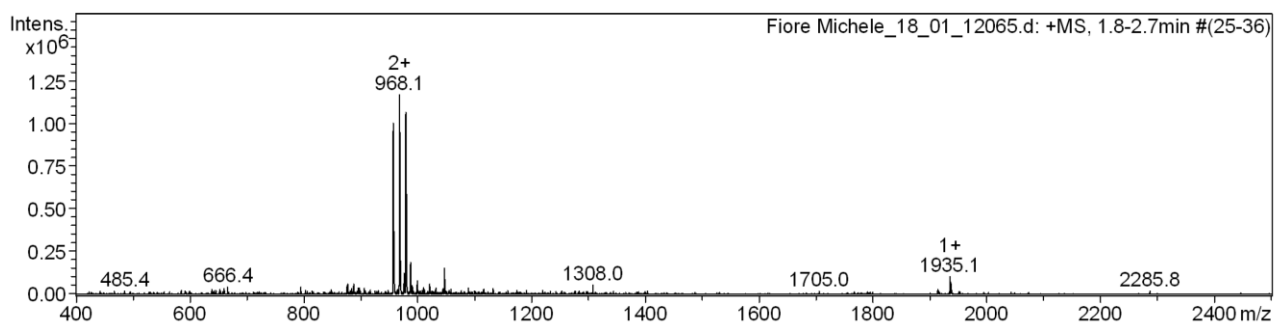

$^1\text{H}$  NMR ( $\text{D}_2\text{O}$ , 400 MHz)

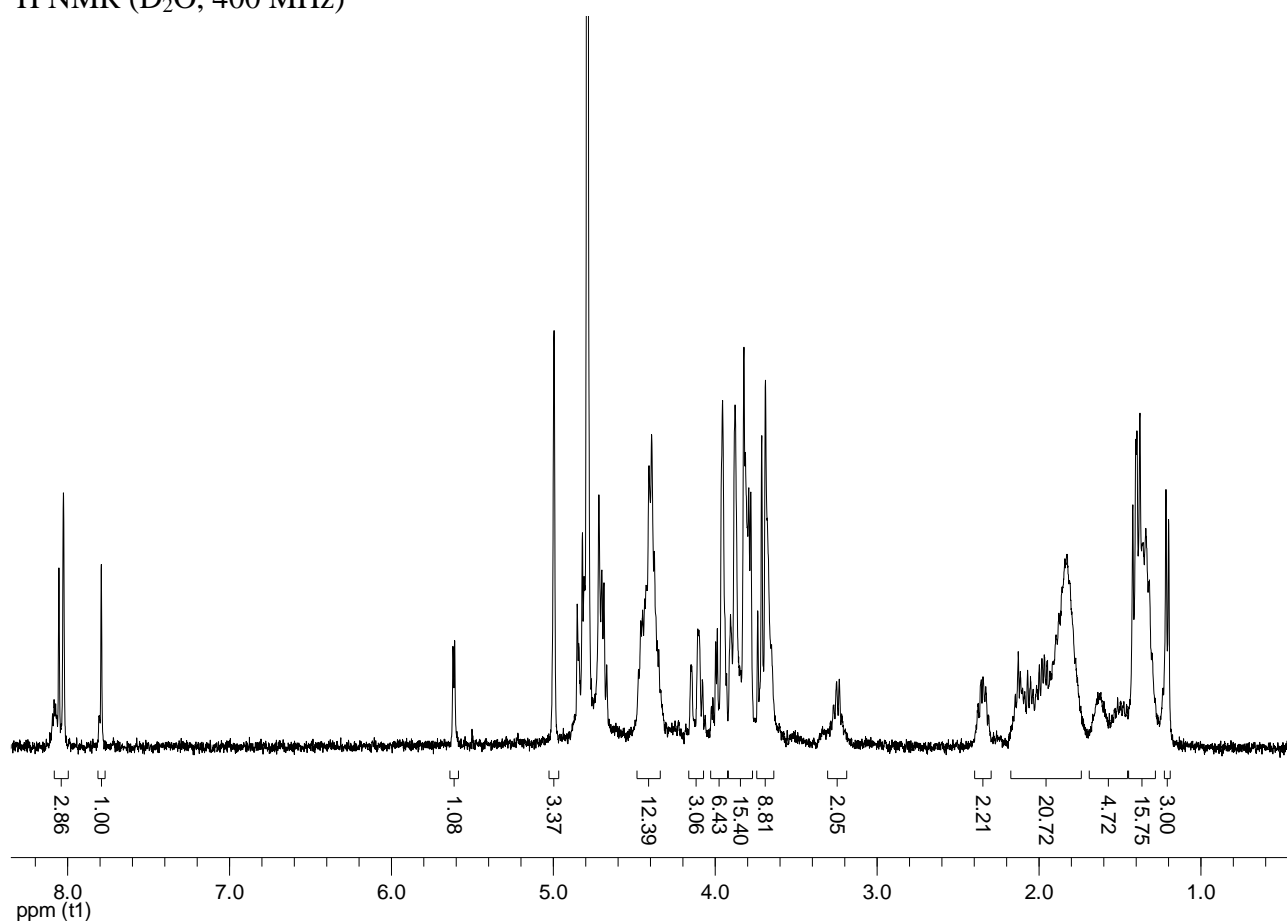

G-COSY ( $\text{D}_2\text{O}$ , 400 MHz)

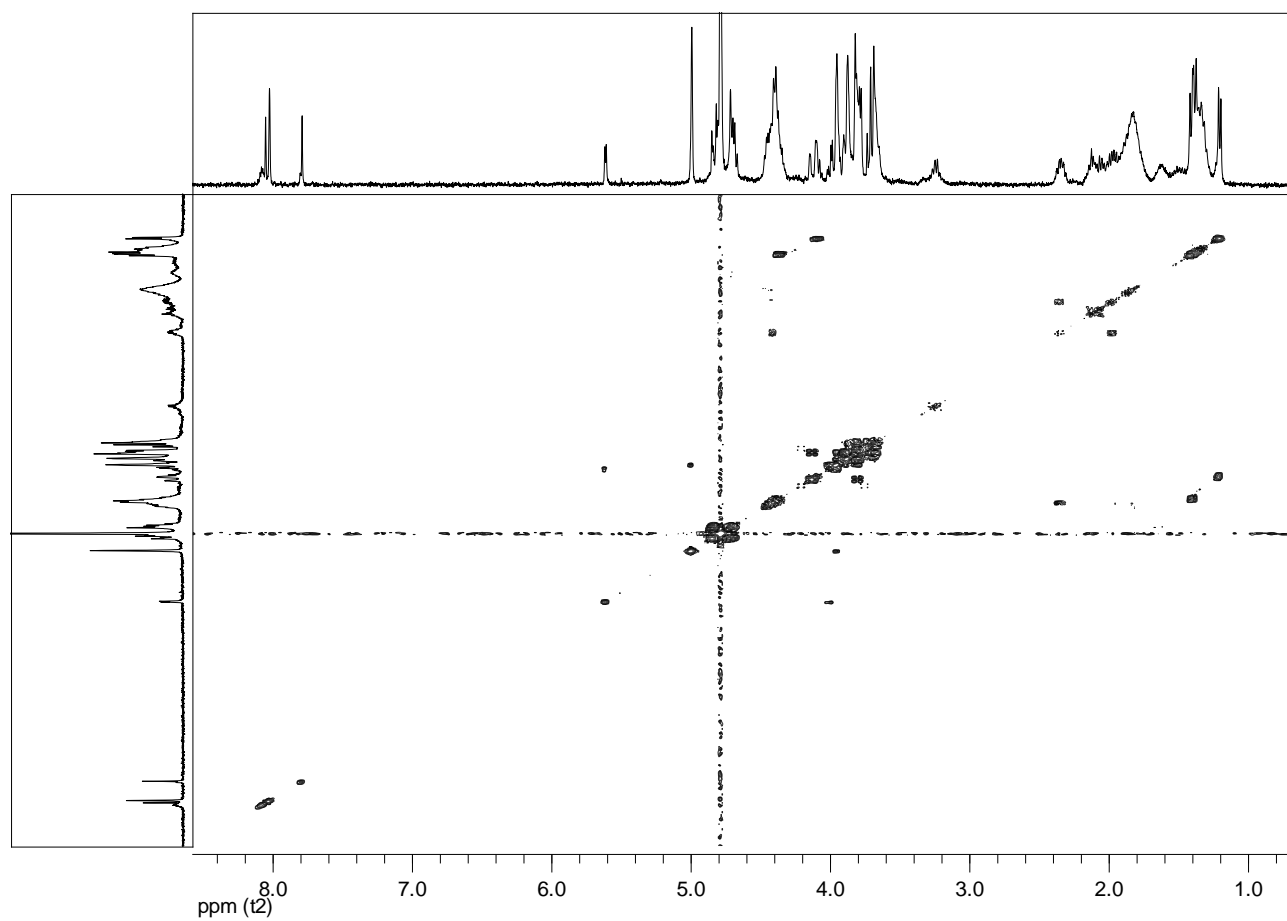

16. Analytical data for compound **8-Fuc/Lac**

Crude RP-HPLC profile (5 to 100% B in 20 min,  $\lambda = 250$  nm)

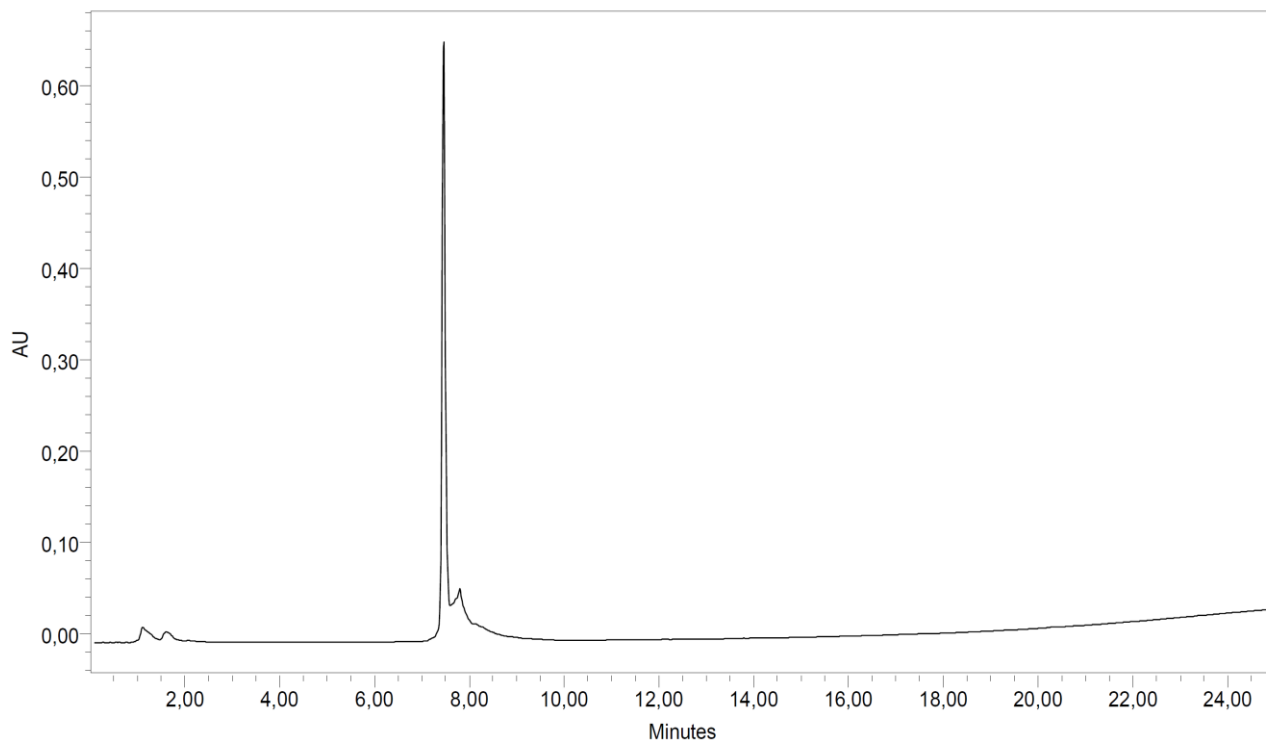

ESI-MS (positive mode): calcd for  $C_{97}H_{156}N_{21}O_{49}$  2400.0, found:  $m/z$  2399.0  $[M + H]^+$

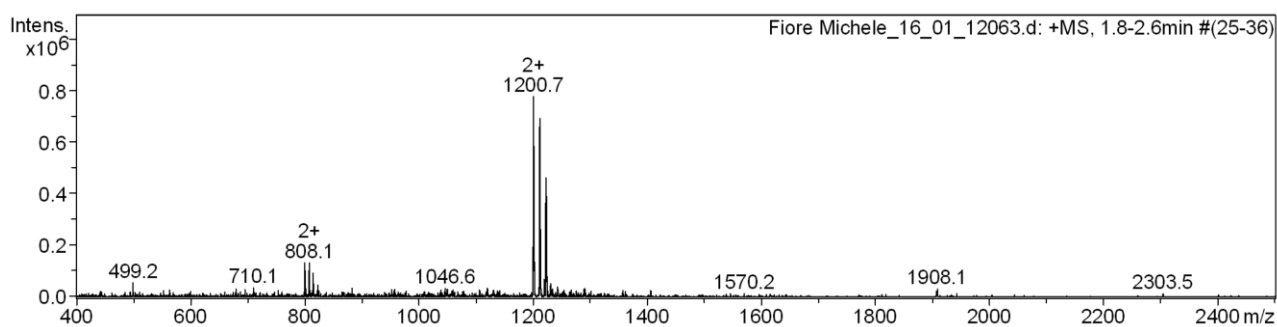

17. Analytical data for compound **8-Lac/Man**

Crude RP-HPLC profile (5 to 100% B in 20 min,  $\lambda = 250$  nm)

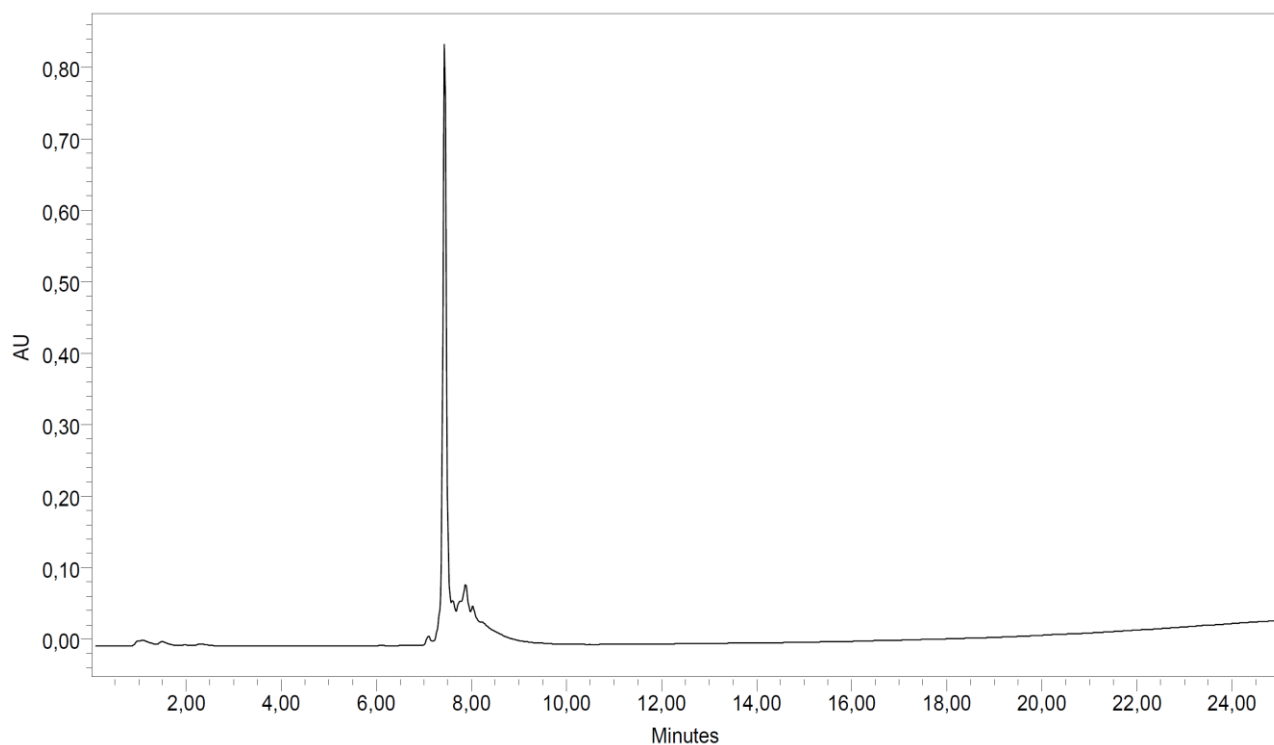

ESI-MS (positive mode): calcd for  $C_{85}H_{136}N_{21}O_{40}$  2092.0, found:  $m/z$  2091.2  $[M + H]^+$

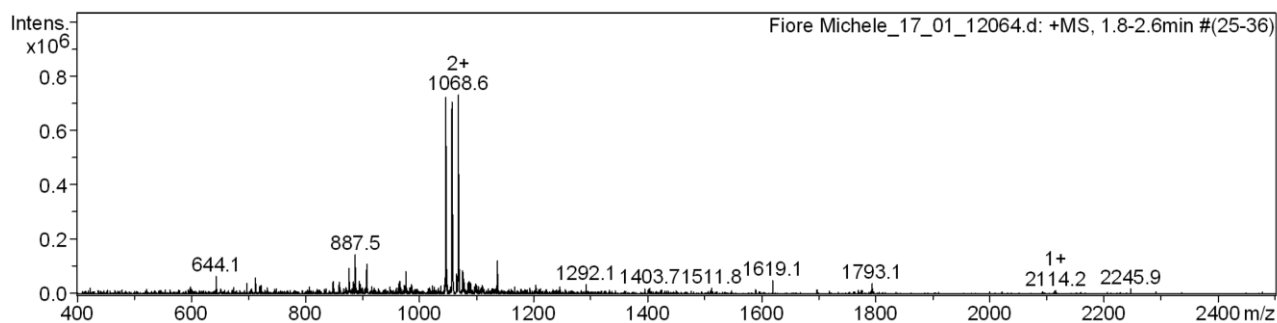

18. Analytical data for compound **8-Lac/Fuc**

Crude RP-HPLC profile (5 to 100% B in 20 min,  $\lambda = 250$  nm)

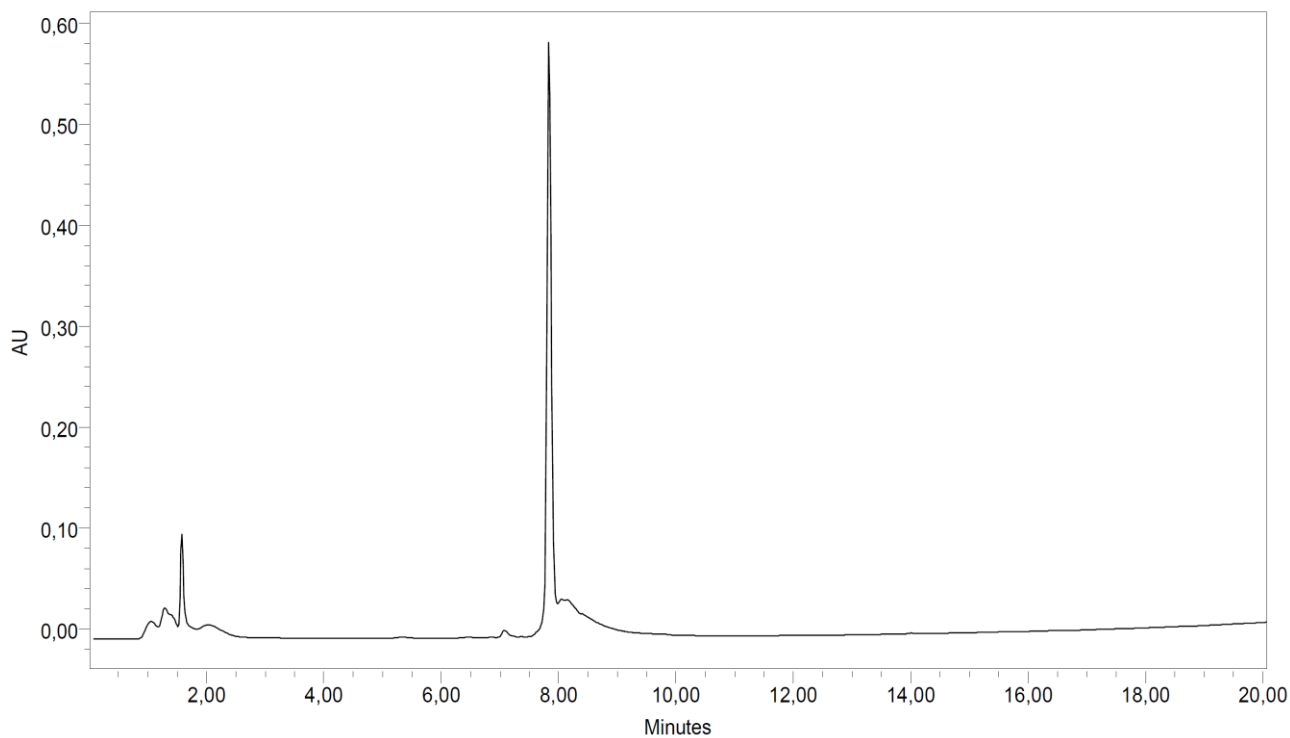

ESI-MS (positive mode): calcd for  $C_{85}H_{136}N_{21}O_{37}$  2043.1, found:  $m/z$  2043.9  $[M + H]^+$

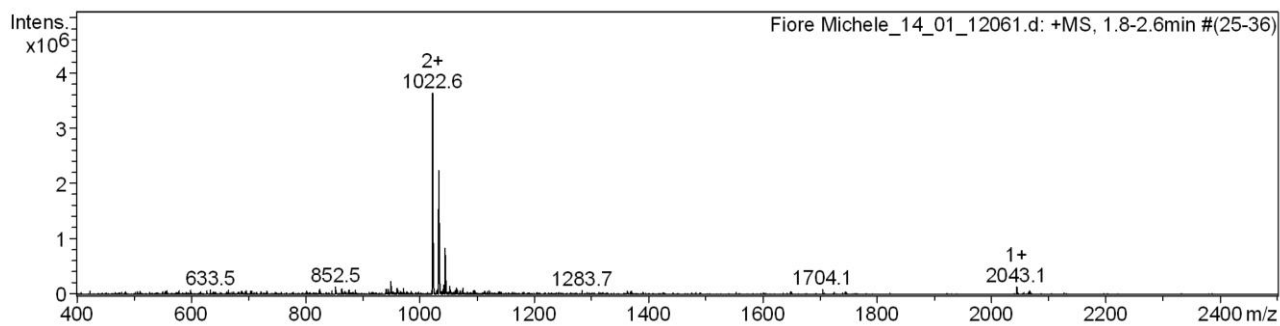

Supplement: Additional file 1 [file 1860-5397-8-47-S1.pdf]
